# Supplementary material
Source: PubMed Central journal article supplement (PMC6283972)
Supplement: rstb20180004supp1.pdf [file rstb20180004supp1.pdf]

# Supporting Information

for

## Predicting current and future background ion concentrations in German surface water under climate change

Le Trong Dieu Hien<sup>a,b</sup>, Mira Kattwinkel<sup>a</sup>, Klaus Schützenmeister<sup>a</sup>, John R.Olson<sup>c</sup>, Charles P. Hawkins<sup>d</sup>, Ralf B. Schäfer<sup>a</sup>

<sup>a</sup> Institute for Environmental Sciences, University Koblenz-Landau, Fortstraße 7, 76829 Landau, Germany.

<sup>b</sup> Faculty of Resources & Environment, University of Thu Dau Mot, 06 Tran Van On street, Thu Dau Mot city, Binh Duong, Vietnam.

<sup>c</sup> School of Natural Sciences, California State University Monterey Bay, Seaside, USA.

<sup>d</sup> Watershed Science, Utah State University, Logan, USA.

### Tables

**Table S1.** Attributes assigned for each unit of lithology.

| Lith                    | %CaO    | %MgO   | %S      | Uniaxial<br>Compressive<br>Strength (Mpa) | Geometric<br>Mean<br>Hydraulic<br>Conductivity<br>( $\mu\text{m}/\text{sec}$ ) |
|-------------------------|---------|--------|---------|-------------------------------------------|--------------------------------------------------------------------------------|
| Amphibolite             | 9.9000  | 6.7000 | 0.0244  | 181.9100                                  | 0.0016                                                                         |
| Andesite                | 6.5000  | 3.5000 | 0.0140  | 128.5600                                  | 0.2380                                                                         |
| Anhydrite               | 39.3000 | 0.3000 | 58.7014 | 89.8300                                   | 0.0018                                                                         |
| Aplite                  | 0.8000  | 0.2000 | 0.0200  | 136.0800                                  | 0.0045                                                                         |
| Arkose                  | 1.3500  | 0.5400 | 0.0142  | 130.9300                                  | 0.0054                                                                         |
| Basalt                  | 9.3000  | 6.5000 | 0.0300  | 193.8200                                  | 0.6070                                                                         |
| Basaltic-andesite       | 8.2000  | 4.1000 | 0.0050  | 55.4000                                   | 0.0551                                                                         |
| Biotite-gneiss          | 2.0000  | 0.6000 | 0.0050  | 152.2000                                  | 0.0253                                                                         |
| Biotite-schist          | 2.3000  | 1.7000 | 0.6900  | 68.8000                                   | 0.2500                                                                         |
| Black-shale             | 0.5000  | 0.4000 | 1.7900  | 19.0500                                   | 0.0001                                                                         |
| Boulders                | 0.4500  | 0.4900 | 0.0200  | 5.0000                                    | 106.0000                                                                       |
| Calcarenite             | 54.3600 | 0.6700 | 0.0471  | 17.6500                                   | 0.4510                                                                         |
| calcareous-Conglomerate | 27.3600 | 1.1200 | NA      | NA                                        | NA                                                                             |
| calcareous-Sandstone    | 21.1400 | 8.4600 | NA      | NA                                        | NA                                                                             |
| calcareous-Siltstone    | 13.9000 | 4.5000 | NA      | NA                                        | NA                                                                             |
| Calc-silicate           | 15.5000 | 3.5000 | 0.0200  | 97.4000                                   | 0.3800                                                                         |
| Carbonate               | 47.7800 | 0.5900 | 0.0459  | 76.5600                                   | 0.1400                                                                         |

| <b>Lith</b>            | <b>%CaO</b> | <b>%MgO</b> | <b>%S</b> | <b>Uniaxial<br/>Compressive<br/>Strength (Mpa)</b> | <b>Geometric<br/>Mean<br/>Hydraulic<br/>Conductivity<br/>(<math>\mu\text{m}/\text{sec}</math>)</b> |
|------------------------|-------------|-------------|-----------|----------------------------------------------------|----------------------------------------------------------------------------------------------------|
| Chalk                  | 53.4000     | 0.3000      | 0.0190    | 18.9800                                            | 0.0013                                                                                             |
| Clay                   | 0.5000      | 1.8000      | 0.0385    | 0.3300                                             | 0.0011                                                                                             |
| Claystone              | 0.9700      | 2.2000      | 0.2700    | 16.1500                                            | 0.0000                                                                                             |
| Conglomerate           | 0.6100      | 0.6400      | 0.0400    | 103.1000                                           | 0.0159                                                                                             |
| Conglomerate-sandstone | 1.0600      | 0.8200      | 0.0350    | 95.6000                                            | 0.0846                                                                                             |
| Dacite                 | 0.0000      | 0.0000      | 0.0200    | 90.7800                                            | 0.1270                                                                                             |
| Diorite                | 6.3000      | 3.2000      | 0.0600    | 226.1400                                           | 0.0013                                                                                             |
| dolomitic-Claystone    | 2.8900      | 2.9000      | NA        | NA                                                 | NA                                                                                                 |
| dolomitic-Limestone    | 28.2000     | 13.4000     | NA        | NA                                                 | NA                                                                                                 |
| dolomitic-Marlstone    | 23.5000     | 3.1000      | NA        | NA                                                 | NA                                                                                                 |
| Dolostone              | 0.0000      | 0.0000      | 0.0320    | 138.2000                                           | 0.0870                                                                                             |
| Eclogite               | 11.5000     | 6.9000      | 0.0120    | 400.0000                                           | 0.0042                                                                                             |
| Foidite                | 10.8000     | 4.1000      | 0.1123    | 43.4000                                            | 1.3900                                                                                             |
| Gabbro                 | 9.7000      | 6.5000      | 0.0600    | 224.0100                                           | 0.7040                                                                                             |
| Gneiss                 | 2.3000      | 1.1000      | 0.0100    | 152.2100                                           | 0.0253                                                                                             |
| Granite                | 0.0000      | 0.0000      | 0.0300    | 188.6800                                           | 0.0001                                                                                             |
| Granodiorite           | 3.4000      | 1.4000      | 0.0070    | 135.6500                                           | 0.0012                                                                                             |
| Granulite              | 9.9000      | 6.6000      | 0.0280    | 214.6700                                           | 0.2910                                                                                             |
| Gravel                 | 0.4100      | 0.4800      | 0.0208    | 2.2900                                             | 8.3000                                                                                             |
| Graywacke              | 0.8400      | 1.8100      | 0.0058    | 81.8800                                            | 0.0137                                                                                             |
| Greenschist            | 8.5000      | 6.7000      | 0.1586    | 49.8100                                            | 0.0086                                                                                             |
| Gypsum                 | 31.3000     | 2.0000      | 41.5189   | 21.5800                                            | 0.0434                                                                                             |
| Hornblende-gneiss      | 2.1000      | 0.6000      | 0.0090    | 152.2000                                           | 0.0253                                                                                             |
| Hornfels               | 1.2000      | 2.8000      | 0.2900    | 256.9500                                           | 0.0001                                                                                             |
| Ice                    | NA          | NA          | NA        | NA                                                 | NA                                                                                                 |
| Igneous                | 6.7900      | 5.3100      | 0.0501    | 128.8000                                           | 0.0083                                                                                             |
| Lamprophyre            | 0.0000      | 0.0000      | 0.0494    | 137.0800                                           | 0.0001                                                                                             |
| Latite                 | 3.1000      | 1.3000      | 0.0500    | 136.5000                                           | 0.0338                                                                                             |
| Limestone              | 0.0000      | 0.0000      | 0.0500    | 102.9500                                           | 0.0244                                                                                             |
| Marble                 | 33.2000     | 2.7000      | 0.1000    | 108.6200                                           | 0.1480                                                                                             |
| Marl                   | 25.2500     | 6.1400      | 0.6500    | 30.9000                                            | 0.0028                                                                                             |
| Marlstone              | 27.6000     | 1.6000      | 0.6800    | 85.9200                                            | 0.0343                                                                                             |
| Metaandesite           | 7.7000      | 4.0000      | 0.0030    | 101.3000                                           | 1.4000                                                                                             |
| Metabasalt             | 8.7000      | 5.7000      | 0.0154    | 101.3000                                           | 1.4000                                                                                             |
| Metadacite             | 2.2000      | 0.5000      | 0.0025    | 101.3000                                           | 1.4000                                                                                             |
| Metadiabase            | 8.9000      | 5.8000      | 0.0270    | 131.7000                                           | 0.8000                                                                                             |
| Metagabbro             | 9.5000      | 6.8000      | 0.0060    | 131.7000                                           | 0.8000                                                                                             |
| Metagranite            | 1.6000      | 0.7000      | 0.0070    | 131.7000                                           | 0.8000                                                                                             |
| Metagraywacke          | 1.9000      | 1.4000      | 0.0005    | 117.3000                                           | 0.0122                                                                                             |
| Metamorphic            | 4.4700      | 3.4800      | 0.0468    | 151.9600                                           | 2.5900                                                                                             |
| Metarhyolite           | 1.0000      | 0.2000      | 0.0040    | 101.3000                                           | 1.4000                                                                                             |
| Mica-schist            | 1.7000      | 2.3000      | 0.0900    | 68.8000                                            | 0.2500                                                                                             |
| Migmatite              | 2.2000      | 1.1000      | 0.0045    | 172.1700                                           | 0.0473                                                                                             |
| Monzogranite           | 1.7000      | 0.5000      | 0.0192    | 155.7900                                           | 0.0004                                                                                             |
| Monzogranite           | 1.7000      | 0.5000      | 0.0192    | 155.7900                                           | 0.0004                                                                                             |
| Monzonite              | 2.3000      | 0.9000      | 0.1850    | 174.6000                                           | 0.0000                                                                                             |

Predicting current and future background ion concentrations in German surface water under climate change

| Lith                   | %CaO    | %MgO    | %S      | Uniaxial<br>Compressive<br>Strength (Mpa) | Geometric<br>Mean<br>Hydraulic<br>Conductivity<br>( $\mu\text{m}/\text{sec}$ ) |
|------------------------|---------|---------|---------|-------------------------------------------|--------------------------------------------------------------------------------|
| Muscovite-gneiss       | 1.1000  | 0.4000  | 0.0030  | 152.2000                                  | 0.0253                                                                         |
| Muscovite-schist       | 0.3000  | 3.5000  | 0.0300  | 68.8000                                   | 0.2500                                                                         |
| Mylonite               | NA      | NA      | NA      | 146.0000                                  | 50.0000                                                                        |
| Orthogneiss            | 2.1000  | 1.5000  | 0.0100  | 152.2100                                  | 0.0300                                                                         |
| Paragneiss             | 2.5000  | 2.7000  | 0.2880  | 152.2100                                  | 0.0300                                                                         |
| Peat                   | 7.0600  | 1.5400  | 3.1333  | 0.0300                                    | 0.0444                                                                         |
| Pegmatite              | 0.8000  | 0.2000  | 0.0500  | 140.8800                                  | 0.0000                                                                         |
| Peridotite             | 3.5000  | 32.5000 | 0.0900  | 125.7300                                  | 0.0398                                                                         |
| Phonolite              | 2.7000  | 0.8000  | 0.0144  | 98.0000                                   | 0.0110                                                                         |
| Phyllite               | 0.7000  | 2.6000  | 0.0450  | 75.0300                                   | 0.0233                                                                         |
| Picrite                | 7.8000  | 13.3000 | 0.0300  | 76.0000                                   | 0.1350                                                                         |
| Pyroxenite             | 14.6000 | 17.0000 | 0.0900  | 130.7100                                  | 2.0500                                                                         |
| Quartz-diorite         | 6.8000  | 3.6000  | 0.0365  | 181.8700                                  | 0.0000                                                                         |
| Quartz-feldspar-schist | 1.3000  | 2.9000  | 0.0600  | 68.8000                                   | 0.2500                                                                         |
| Quartzite              | 0.6000  | 1.1000  | 0.0100  | 242.4300                                  | 0.0343                                                                         |
| Rhyolite               | 1.1000  | 0.4000  | 0.0200  | 203.7300                                  | 2.2400                                                                         |
| Salt                   | 7.7000  | 3.3000  | 22.4600 | 22.3100                                   | 0.0001                                                                         |
| Sand                   | 1.4700  | 1.1100  | 0.0200  | 0.9600                                    | 16.0000                                                                        |
| Sandstone              | 1.5000  | 1.0000  | 0.0300  | 88.0600                                   | 0.4510                                                                         |
| Sedimentary            | NA      | NA      | 0.5643  | 68.6000                                   | 0.0063                                                                         |
| Sedimentary-breccia    | 9.7000  | 0.7300  | 0.1880  | 65.6600                                   | 0.0001                                                                         |
| Serpentinite           | 0.3000  | 35.1000 | 0.1700  | 86.5900                                   | 0.0297                                                                         |
| Silt                   | 3.0900  | 1.4300  | 0.0700  | 0.3800                                    | 0.0066                                                                         |
| Siltstone              | 0.9900  | 1.7000  | 0.1300  | 62.4500                                   | 0.0016                                                                         |
| Skarn                  | 27.6000 | 2.3000  | 0.0200  | 202.8300                                  | 0.3160                                                                         |
| Slate                  | 0.4000  | 1.6000  | 0.1400  | 144.2800                                  | 0.0000                                                                         |
| Syenite                | 2.1000  | 0.7000  | 0.1700  | 218.4200                                  | 0.0000                                                                         |
| Syenogranite           | 0.6000  | 0.2000  | 0.0110  | 188.6800                                  | 0.0001                                                                         |
| Tectonite              | NA      | NA      | NA      | 118.2500                                  | 0.0842                                                                         |
| Tonalite               | 4.9000  | 2.1000  | 0.0100  | 124.3700                                  | 0.0000                                                                         |
| Trachyte               | 0.0000  | 0.0000  | 0.0200  | 232.5500                                  | 0.0775                                                                         |
| tuff                   | NA      | NA      | NA      | 30.3700                                   | 0.0048                                                                         |
| tuff-Andesite          | NA      | NA      | NA      | 30.3700                                   | 0.0048                                                                         |
| tuff-Basalt            | NA      | NA      | NA      | 30.3700                                   | 0.0048                                                                         |
| tuff-Rhyolite          | NA      | NA      | NA      | 30.3700                                   | 0.0048                                                                         |
| tuff-Trachyte          | NA      | NA      | NA      | 30.3700                                   | 0.0048                                                                         |
| Volcanic               | 7.5900  | 5.9800  | 0.0265  | 95.0000                                   | 0.1110                                                                         |
| Water                  | NA      | NA      | NA      | NA                                        | NA                                                                             |

Source: Olson & Hawkins, 2012 [1]

**Table S2.** Sources of environmental data

| <b>Properties</b>               | <b>Sources</b>                                            | <b>Type</b> | <b>Extent</b> | <b>Resolution</b> | <b>Year</b> |
|---------------------------------|-----------------------------------------------------------|-------------|---------------|-------------------|-------------|
| Geology                         | Institute for Geosciences and Natural Resources (BGR) [2] | Vector      | Germany       | 1:200,000         | 2007        |
| Climate                         | DWD Climate Data Center [3]                               | Raster      | Germany       | 1km x 1km         | 1981-2015   |
| Available water capacity        | Institute for Geosciences and Natural Resources (BGR) [4] | Raster      | Germany       | 250m x 250m       | 2015        |
| Bulk density                    | European Soil Data Centre (ESDAC) [5]                     | Raster      | Europe        | 1km x 1km         | 2013        |
| Organic matter content          | European Soil Data Centre (ESDAC) [6]                     | Raster      | Europe        | 1km x 1km         | 2015        |
| Soil erodibility                | European Soil Data Centre (ESDAC) [7]                     | Raster      | Europe        | 500m x 500m       | 2014        |
| Soil permeability               | Institute for Geosciences and Natural Resources (BGR) [8] | Vector      | Europe        | 1:200,000         | 2016        |
| Soil depth                      | Institute for Geosciences and Natural Resources (BGR) [9] | Raster      | Germany       | 250m x 250m       | 2015        |
| Water table depth               | Fan, Y., H. Li, G. Miguez Macho (2013) [10]               | Raster      | World         | 1km x 1km         | 2013        |
| Enhanced vegetation index (EVI) | MODIS Vegetation Indices [11]                             | Raster      | Germany       | 1km x 1km         | 2005-2016   |
| Groundwater recharge velocity   | Institute for Geosciences and Natural Resources (BGR) [4] | Raster      | Germany       | 1km x 1km         | 2008        |

**Table S3.** Highly correlated variables

| Var 1                     | Var 2                     | Correlation coefficient (EC model) | Correlation coefficient (Ca <sup>2+</sup> /Mg <sup>2+</sup> ) model) | Correlation coefficient (SO <sub>4</sub> <sup>2-</sup> ) |
|---------------------------|---------------------------|------------------------------------|----------------------------------------------------------------------|----------------------------------------------------------|
| Mean catchment elevation  | Mean compressive strength | 0.76                               | 0.70                                                                 | 0.75                                                     |
| Mean catchment elevation  | Mean annual precipitation | 0.75                               | 0.71                                                                 | 0.73                                                     |
| Mean catchment elevation  | Mean freeze days          | 0.89                               | 0.87                                                                 | 0.86                                                     |
| Mean catchment elevation  | Mean water table depth    | 0.79                               | 0.77                                                                 | 0.78                                                     |
| Mean catchment elevation  | Mean recharge speed       | 0.72                               | 0.70                                                                 | 0.72                                                     |
| Mean annual precipitation | Mean recharge speed       | 0.89                               | 0.91                                                                 | 0.91                                                     |
| Mean catchment elevation  | Mean annual temperature   | -0.95                              | -0.94                                                                | -0.94                                                    |
| Mean compressive strength | Mean annual temperature   | -0.72                              |                                                                      | -0.71                                                    |
| Mean freeze days          | Mean annual temperature   | -0.94                              | -0.94                                                                | -0.94                                                    |
| Mean water table depth    | Mean annual temperature   | -0.74                              | -0.74                                                                | -0.72                                                    |

**Table S4:** Values of  $\alpha$  and  $\lambda$  values of optimal models in elastic net regression

| Models                        | Alpha ( $\alpha$ ) | Lamda ( $\lambda$ ) |
|-------------------------------|--------------------|---------------------|
| EC                            | 1                  | 0.0001              |
| Ca <sup>2+</sup>              | 0                  | 0.0405              |
| Mg <sup>2+</sup>              | 1                  | 0.0102              |
| SO <sub>4</sub> <sup>2-</sup> | 0.78               | 0.0001              |

**Table S5:** The size of tree (mtry) and out of bag (OOB) errors for RF models

| Models                        | mtry | OOB error |
|-------------------------------|------|-----------|
| EC                            | 3    | 0.028     |
| Ca <sup>2+</sup>              | 3    | 0.053     |
| Mg <sup>2+</sup>              | 4    | 0.042     |
| SO <sub>4</sub> <sup>2-</sup> | 6    | 0.036     |

20 **Table S6: Coefficient and order of important variables in LR and RF models**

| Random forest model                     |           |         |      | Linear Regression model with elastic net |           |             |      |
|-----------------------------------------|-----------|---------|------|------------------------------------------|-----------|-------------|------|
| Predictor                               | Direction | %IncMSE | Rank | Predictor                                | Direction | Coefficient | Rank |
| <b>Electrical Conductivity (log EC)</b> |           |         |      |                                          |           |             |      |
|                                         |           |         |      | Intercept                                | +         | 3.69E+00    |      |
| Mean annual precipitation               | -         | 61      | 1    | Percent CaO                              | +         | 3.05E-01    | 1    |
| Percent CaO                             | +         | 39      | 2    | Mean annual temperature                  | +         | 9.15E-02    | 2    |
| Percent S                               | +         | 39      | 3    | Percent S                                | +         | 6.88E-02    | 3    |
| Mean annual temperature                 | +         | 38      | 4    | Mean annual precipitation                | -         | -1.57E-02   | 4    |
| Mean soil depth                         | +         | 36      | 5    | Percent MgO                              | +         | 1.70E-02    | 5    |
| Mean EVI                                | +         | 35      | 6    | Log catchment area                       | +         | 1.34E-02    | 6    |
| Soil mean organic matter content        | +         | 34      | 7    | Mean EVI                                 | +         | 5.87E-03    | 7    |
| Mean hydraulic conductivity             | +         | 30      | 8    | Mean hydraulic conductivity              | +         | 2.67E-03    | 8    |
|                                         |           |         |      | Mean soil depth                          | +         | 4.86E-04    | 9    |
|                                         |           |         |      | Mean water table depth                   | -         | -1.19E-03   | 10   |
|                                         |           |         |      | Mean catchment elevation                 | -         | -1.09E-03   | 11   |
|                                         |           |         |      | Mean compressive strength                | -         | -6.39E-04   | 12   |
|                                         |           |         |      | Mean soil permeability                   | -         | -2.69E-04   | 13   |
|                                         |           |         |      | Mean available water capacity            | -         | -1.59E-04   | 14   |
|                                         |           |         |      | Mean recharge speed                      | -         | -1.46E-04   | 15   |
| <b>Calcium (log Ca<sup>2+</sup>)</b>    |           |         |      |                                          |           |             |      |
|                                         |           |         |      | Intercept                                | +         | 1.68E+00    |      |
| Mean annual precipitation               | -         | 55      | 1    | Percent CaO                              | +         | 1.64E+00    | 1    |
| Percent CaO                             | +         | 44      | 2    | Mean annual temperature                  | +         | 6.66E-01    | 2    |
| Mean EVI                                | +         | 42      | 3    | Percent S                                | +         | 1.50E-01    | 3    |
| Percent S                               | +         | 41      | 4    | Mean annual precipitation                | -         | -6.55E-02   | 4    |
| Mean hydraulic conductivity             | +         | 36      | 5    | Log soil mean organic matter content     | +         | 5.18E-02    | 5    |
| Mean compressive strength               | +         | 36      | 6    | Mean hydraulic conductivity              | +         | 3.78E-02    | 6    |
| Mean annual temperature                 | +         | 30      | 7    | Mean soil erodibility                    | +         | 1.87E-02    | 7    |
|                                         |           |         |      | Percent MgO                              | +         | 1.08E-02    | 8    |

**Predicting current and future background ion concentrations in German surface water under climate change**

| Random forest model                               |           |         |      | Linear Regression model with elastic net |           |             |      |
|---------------------------------------------------|-----------|---------|------|------------------------------------------|-----------|-------------|------|
| Predictor                                         | Direction | %IncMSE | Rank | Predictor                                | Direction | Coefficient | Rank |
|                                                   |           |         |      | Mean soil permeability                   | -         | -1.17E-02   | 9    |
|                                                   |           |         |      | Log catchment area                       | +         | 1.03E-02    | 10   |
|                                                   |           |         |      | Mean soil depth                          | +         | 9.54E-03    | 11   |
|                                                   |           |         |      | Mean water table depth                   | -         | -2.39E-03   | 12   |
|                                                   |           |         |      | Mean EVI                                 | +         | 5.33E-03    | 13   |
|                                                   |           |         |      | Mean freeze days                         | -         | -2.16E-03   | 14   |
|                                                   |           |         |      | Mean available water capacity            | -         | -9.04E-04   | 15   |
|                                                   |           |         |      | Mean recharge speed                      | -         | -6.92E-04   | 16   |
|                                                   |           |         |      | Mean compressive strength                | -         | -5.24E-04   | 17   |
|                                                   |           |         |      | Mean bulk density                        | +         | 3.53E-04    | 18   |
|                                                   |           |         |      | Mean catchment elevation                 | -         | -3.67E-04   | 19   |
| <b>Magnesium (log Mg<sup>2+</sup>)</b>            |           |         |      |                                          |           |             |      |
|                                                   |           |         |      | Intercept                                | +         | 1.24E+00    | 1    |
| Mean annual precipitation                         | +         | 59      | 1    | Percent S                                | -         | 1.69E-01    | 2    |
| Percent MgO                                       | +         | 47      | 2    | Percent MgO                              | +         | 1.36E-01    | 3    |
| Percent S                                         | +         | 36      | 3    | Mean EVI                                 | +         | 8.23E-02    | 4    |
| Mean annual temperature                           | +         | 35      | 4    | Annual precipitation                     | -         | -2.32E-02   | 5    |
| Mean EVI                                          | +         | 32      | 5    | Annual freezed days                      | -         | -5.35E-03   | 6    |
| Mean compressive strength                         | -         | 38      | 6    | Mean soil permeability                   | -         | -4.25E-03   | 7    |
| Mean soil erodibility                             | +         | 27      | 7    | Log catchment area                       | -         | -2.52E-03   | 8    |
| Mean soil permeability                            | -         | 20      | 8    | Mean recharge speed                      | -         | -8.19E-04   | 9    |
|                                                   |           |         |      | Mean bulk density                        | +         | 5.45E-04    | 10   |
|                                                   |           |         |      | Mean compressive strength                | -         | -3.39E-04   | 11   |
|                                                   |           |         |      | Mean available water capacity            | -         | -9.85E-05   | 12   |
|                                                   |           |         |      | Mean catchment elevation                 | -         | -5.11E-05   | 13   |
| <b>Sulphate (log SO<sub>4</sub><sup>2-</sup>)</b> |           |         |      |                                          |           |             |      |
|                                                   |           |         |      | Intercept                                | +         | 2.00E+00    |      |
| Mean annual precipitation                         | -         | 98      | 1    | Percent CaO                              | +         | 1.28E+00    | 1    |
| Mean soil permeability                            | -         | 37      | 2    | Mean annual temperature                  | +         | 5.86E-01    | 2    |

**Predicting current and future background ion concentrations in German surface water under climate change**

| Random forest model           |           |         |      | Linear Regression model with elastic net |           |             |      |
|-------------------------------|-----------|---------|------|------------------------------------------|-----------|-------------|------|
| Predictor                     | Direction | %IncMSE | Rank | Predictor                                | Direction | Coefficient | Rank |
| Mean hydraulic conductivity   | +         | 30      | 3    | Percent S                                | +         | 1.17E-01    | 3    |
| Mean soil depth               | +         | 28      | 4    | Log soil mean organic matter content     | +         | 6.04E-02    | 4    |
| Mean available water capacity | +         | 27      | 5    | Mean bulk density                        | +         | 5.57E-02    | 5    |
| Mean annual temperature       | +         | 25      | 6    | Percent MgO                              | +         | 3.13E-02    | 6    |
| Percent S                     | +         | 24      | 7    | Mean EVI                                 | +         | 2.35E-02    | 7    |
| Mean bulk density             | +         | 24      | 8    | Mean hydraulic conductivity              | +         | 1.40E-02    | 8    |
| Mean EVI                      | +         | 20      | 9    | Mean soil permeability                   | -         | -1.23E-02   | 9    |
| Percent MgO                   | +         | 12      | 10   | Annual freezed days                      | -         | -1.04E-02   | 10   |
|                               |           |         |      | Log catchment area                       | -         | -5.19E-03   | 11   |
|                               |           |         |      | Mean water table depth                   | +         | 1.33E-03    | 12   |
|                               |           |         |      | Mean catchment elevation                 | -         | -1.15E-03   | 13   |
|                               |           |         |      | Mean soil erodibility                    | +         | 8.07E-04    | 14   |
|                               |           |         |      | Mean annual precipitation                | -         | -6.16E-04   | 15   |
|                               |           |         |      | Mean soil depth                          | +         | 2.82E-04    | 16   |
|                               |           |         |      | Mean compressive strength                | -         | -2.22E-04   | 17   |
|                               |           |         |      | Mean available water capacity            | +         | 2.11E-04    | 18   |
|                               |           |         |      | Mean recharge speed                      | -         | -1.05E-04   | 19   |

**Table S7.** Change in temperature and precipitation for Germany in period from 2070-2100

| Period              | Temperature (°C) |       |       | Precipitation (mm/year) |        |         |
|---------------------|------------------|-------|-------|-------------------------|--------|---------|
|                     | Min              | Mean  | Max   | Min                     | Mean   | Max     |
| Current (1981-2015) | -3.62            | 8.93  | 11.38 | 399.00                  | 807.02 | 3258.47 |
| RCP2.6 (2070-2100)  | -0.52            | 10.92 | 13.83 | 421.00                  | 698.77 | 1785.00 |
| RCP8.5 (2070-2100)  | 2.62             | 13.64 | 16.49 | 418.00                  | 691.43 | 1740.00 |



## Figures

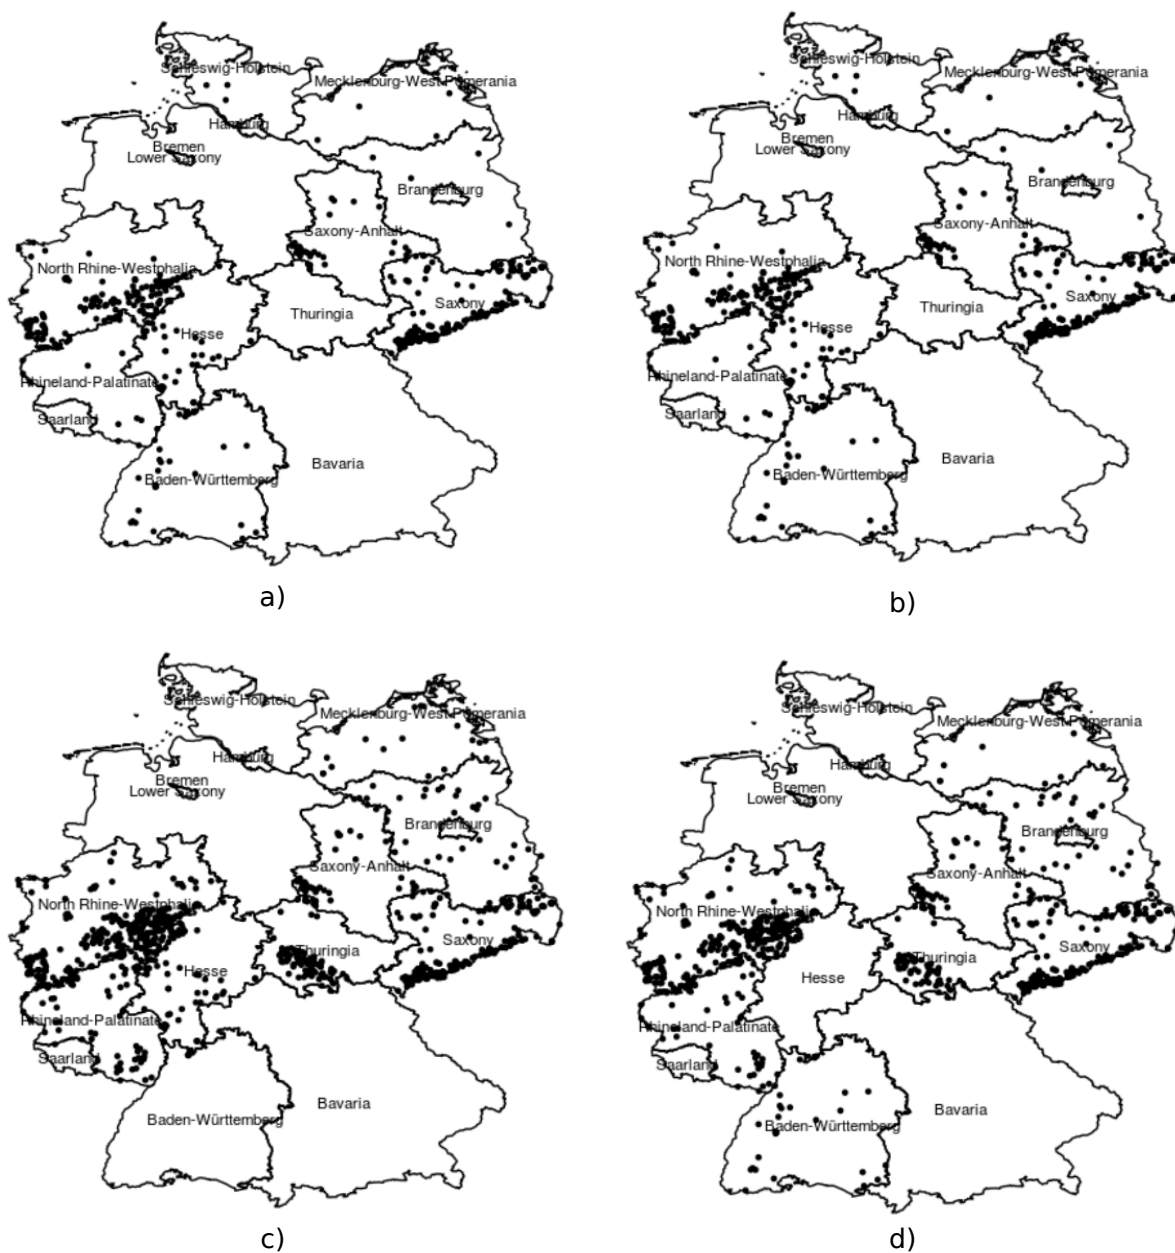

**Fig S1.** Location of monitoring sites a) Ca sites (266 sites) b) Mg sites (266 sites) c) EC sites (410 sites) d)  $\text{SO}_4^{2-}$  sites (357 sites)

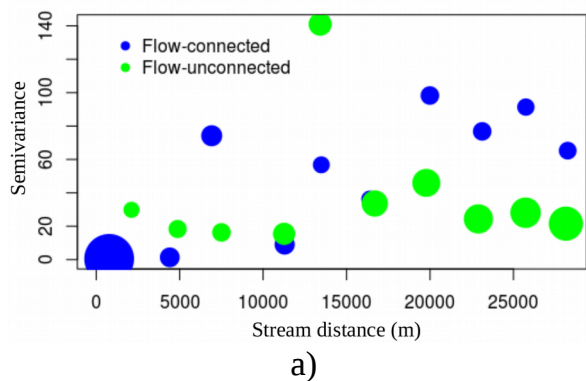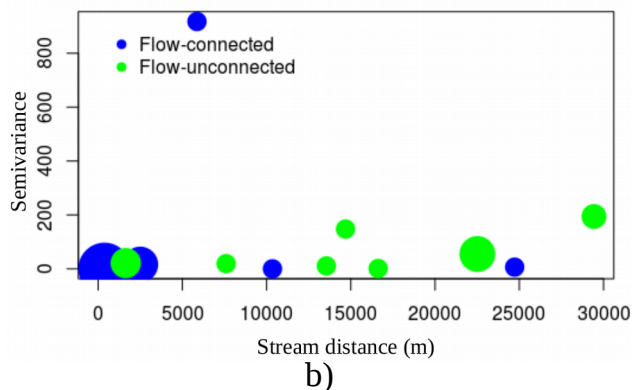

Predicting current and future background ion concentrations in German surface water under climate change

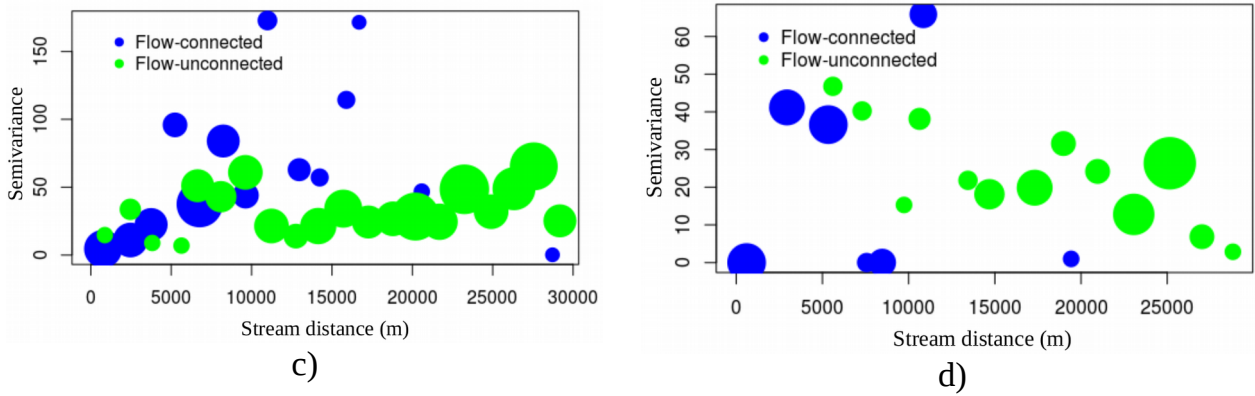

**Fig S2:** Semivariogram of EC measurements in the German states a) Saxony b) Hesse c)North Rhine-Westphalia d)Thuringia

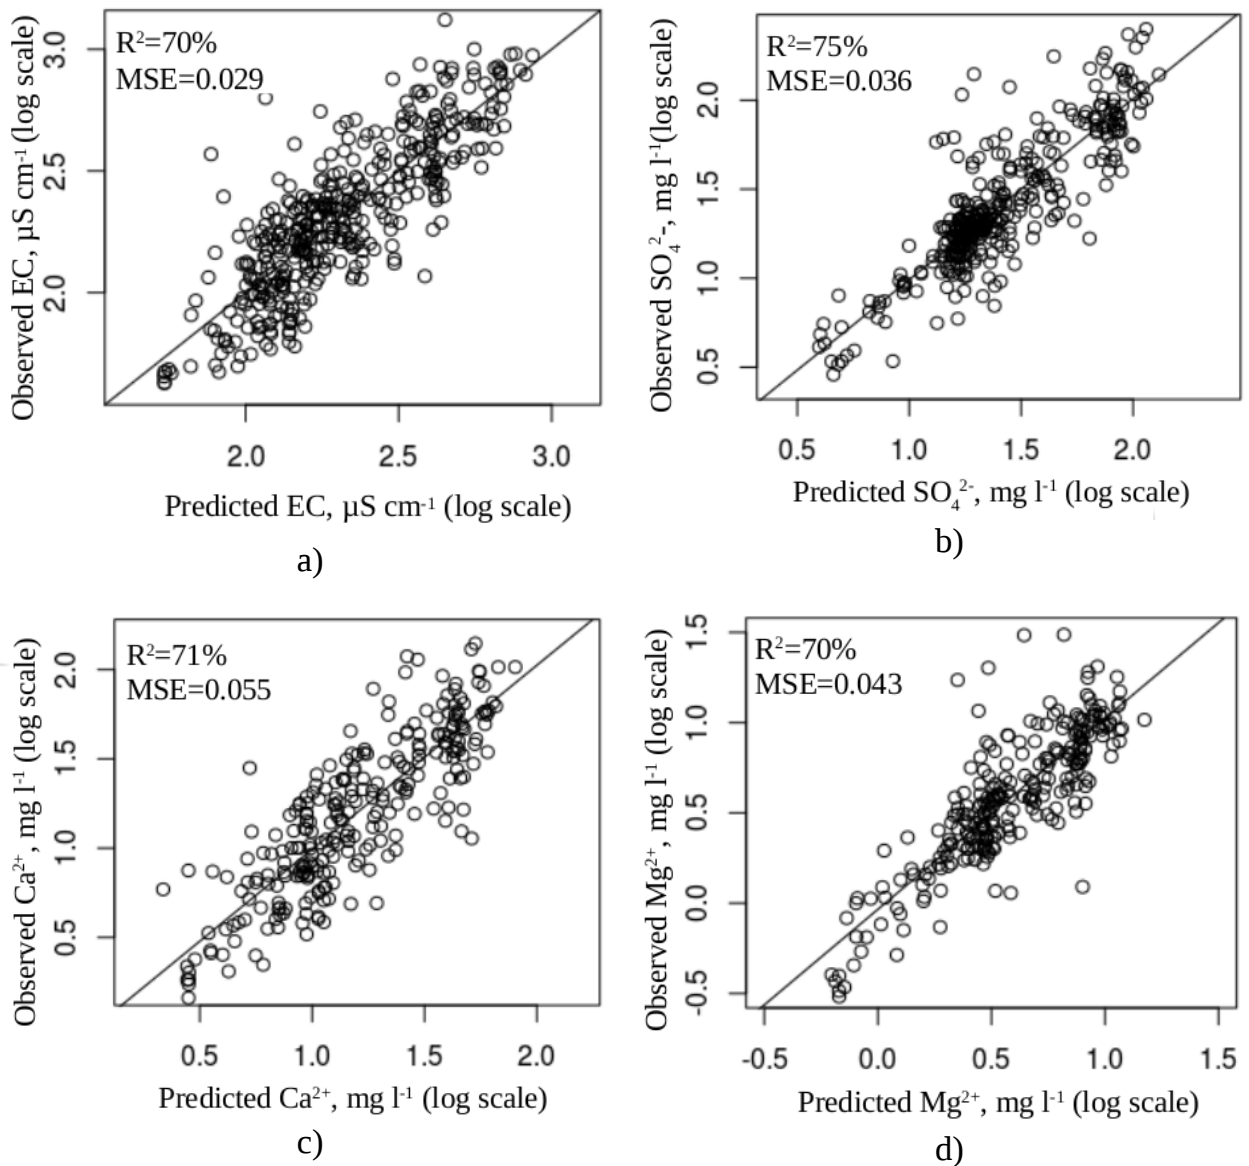

**Fig S3** Plots of predicted versus observed values in LR a) Electrical conductivity b) Sulfate c) Calcium d) Magnesium

Predicting current and future background ion concentrations in German surface water under climate change

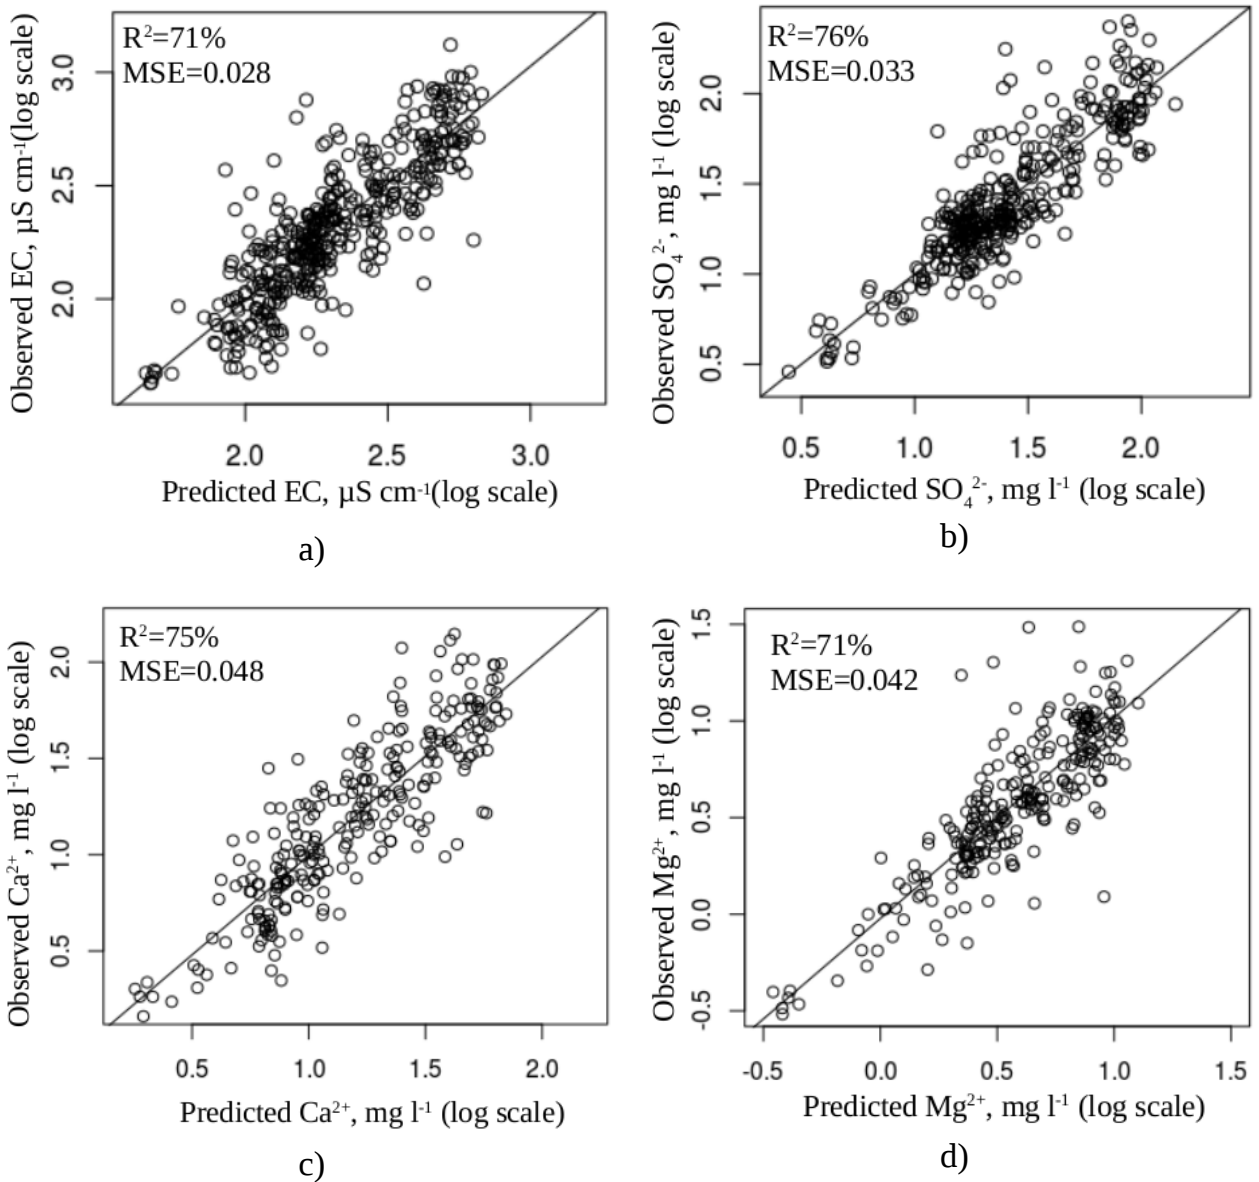

**Fig S4** Plots of predicted versus observed values in RF a) Electrical conductivity b) Sulfate c) Calcium d) Magnesium

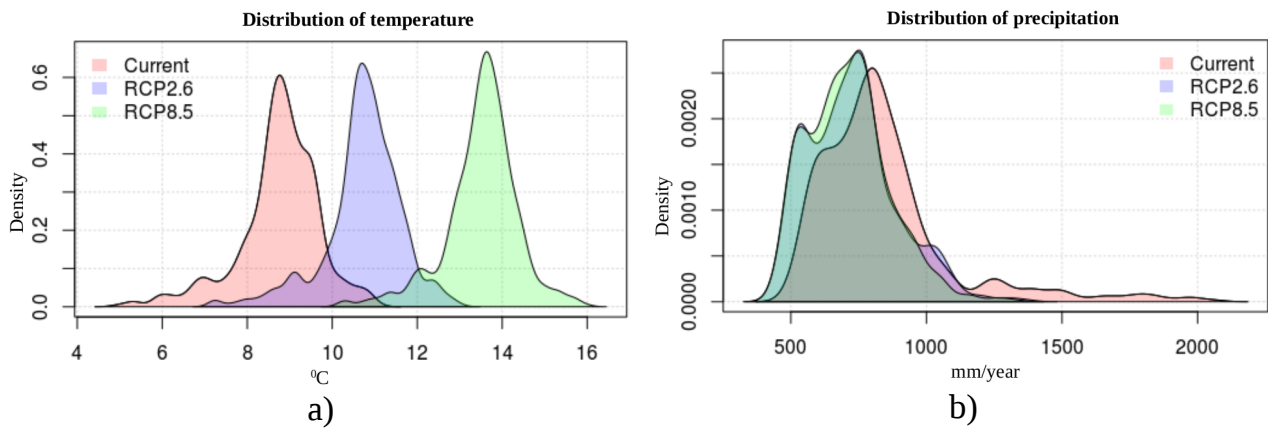

**Fig S5.** Distribution of temperature and precipitation in 610 sample sites in Germany in period from 2070-2100 a) Temperature b) Precipitation

## Reference

1. Olson JR, Hawkins CP. 2012 Predicting natural base-flow stream water chemistry in the western United States. *Water Resour. Res.* **48**, W02504. (doi:10.1029/2011WR011088)
2. In press. BGR - Geology 1:2.000.000 - The General Geological Map of the Federal Republic of Germany 1 : 200 000 (GÜK200). See [https://www.bgr.bund.de/EN/Themen/Sammlungen-Grundlagen/GG\\_geol\\_Info/Karten/Deutschland/GUEK200/guek200\\_inhalt\\_en.html](https://www.bgr.bund.de/EN/Themen/Sammlungen-Grundlagen/GG_geol_Info/Karten/Deutschland/GUEK200/guek200_inhalt_en.html) (accessed on 16 July 2018).
3. In press. Wetter und Klima - Deutscher Wetterdienst - CDC (Climate Data Center). See [https://www.dwd.de/EN/climate\\_environment/cdc/cdc\\_node.html](https://www.dwd.de/EN/climate_environment/cdc/cdc_node.html) (accessed on 16 July 2018).
4. In press. BGR - Groundwater. See [https://www.bgr.bund.de/EN/Themen/Wasser/wasser\\_node\\_en.html](https://www.bgr.bund.de/EN/Themen/Wasser/wasser_node_en.html) (accessed on 16 July 2018).
5. In press. Bulk density - ESDAC - European Commission. See <https://esdac.jrc.ec.europa.eu/taxonomy/term/3010> (accessed on 16 July 2018).
6. de Brogniez D, Ballabio C, Stevens A, Jones RJA, Montanarella L, van Wesemael B. 2015 A map of the topsoil organic carbon content of Europe generated by a generalized additive model: Soil organic carbon content at pan-European level. *Eur. J. Soil Sci.* **66**, 121–134. (doi:10.1111/ejss.12193)
7. Panagos P, Meusburger K, Ballabio C, Borrelli P, Alewell C. 2014 Soil erodibility in Europe: A high-resolution dataset based on LUCAS. *Sci. Total Environ.* **479–480**, 189–200. (doi:10.1016/j.scitotenv.2014.02.010)
8. In press. BGR - Basic groundwater information. See [https://www.bgr.bund.de/EN/Themen/Wasser/Informationsgrundlagen/informationsgrundlagen\\_node\\_en.html](https://www.bgr.bund.de/EN/Themen/Wasser/Informationsgrundlagen/informationsgrundlagen_node_en.html) (accessed on 16 July 2018).
9. In press. BGR - Soil. See [https://www.bgr.bund.de/EN/Themen/Boden/boden\\_node\\_en.html](https://www.bgr.bund.de/EN/Themen/Boden/boden_node_en.html) (accessed on 16 July 2018).
10. Fan Y, Li H, Miguez-Macho G. 2013 Global Patterns of Groundwater Table Depth. *Science* **339**, 940–943. (doi:10.1126/science.1229881)
11. K. Didan. 2015 MOD13A1 MODIS/Terra Vegetation Indices 16-Day L3 Global 500m SIN Grid V006. (doi:10.5067/MODIS/MOD13A1.006)
